# Supplementary material for: Probiotics Fermented Bitter Melon Juice as Promising Complementary Agent for Diabetes Type 2: Study on Animal Model
Source: Hindawi journal article supplement (doi:10.1155/2020/6369873), 2020-02-28
Supplement: f1 [file 6369873.f1.pdf]

Table 1. Baseline normal blood glucose

| Characteristics            | DM-Ac      | DM-MC      | DM-PMC     | DM-Ctrl    |
|----------------------------|------------|------------|------------|------------|
| Fasting blood glucose      | 62.1 ±1.09 | 67.4 ±2.66 | 67.0 ±1.60 | 67.0 ±1.67 |
| Postprandial blood glucose | 72.9±0.89  | 72.4 ±2.89 | 71.5 ±2.13 | 71.9 ±1.32 |

Values are represented as Mean ± SD (n = 6). Means within the same row carrying different superscripts are significant at p < 0.05.

Table 2. Within-group and between-group comparisons of blood glucose before and after administration

| Groups                             | <i>pretest</i>             | <i>posttest</i>           | <i>p</i> <sup>a</sup> |
|------------------------------------|----------------------------|---------------------------|-----------------------|
| <b>Fasting Blood Glucose</b>       |                            |                           |                       |
| 1 (DM-Ac)                          | 255.0 ± 2.79               | 88.9 ± 2.16 <sup>a</sup>  | 0.000*                |
| 2 (DM-MC)                          | 259.0 ± 2.22               | 164.3 ± 2.21 <sup>c</sup> | 0.000*                |
| 3 (DM-PMC)                         | 260.4 ± 2.80               | 109.1 ± 2.07 <sup>b</sup> | 0.000*                |
| 4 (water)                          | 259.7 ± 5.52               | 264.4 ± 5.22 <sup>d</sup> | 0.007*                |
| <i>F test</i>                      | 2.802                      | 3600.286                  |                       |
| <i>P</i>                           | 0.066                      | 0.000                     |                       |
| <b>Post Prandial Blood Glucose</b> |                            |                           |                       |
| 1 (DM-Ac)                          | 266.3 ± 1.81 <sup>a</sup>  | 100.4 ± 2.90 <sup>a</sup> | 0.000*                |
| 2 (DM-MC)                          | 271.4 ± 3.15 <sup>ab</sup> | 174.9 ± 2.04 <sup>c</sup> | 0.000*                |
| 3 (DM-PMC)                         | 271.8 ± 2.86 <sup>b</sup>  | 120.1 ± 2.49 <sup>b</sup> | 0.000*                |
| 4 (water)                          | 271.6 ± 4.89 <sup>ab</sup> | 275.3 ± 4.73 <sup>d</sup> | 0.014*                |
| <i>F test</i>                      | 3.702                      | 3573.526                  |                       |
| <i>P</i>                           | 0.059                      | 0.000                     |                       |

Values are represented as Mean ± SD (n = 6). Means within the same column carrying different superscripts are significant at p < 0.05. <sup>a</sup>Obtained from a paired t-test for the pretest and posttest comparisons (p < 0.05). Grup DM-Ac rats were given acarbose 40 mg/100 g feed. Group DM-MC rats were given 10 mg/kg BW bitter melon juice orally. Group DM-PMC rats were given 10 mg/kg BW fermented bitter melon juice containing 10<sup>7</sup> probiotics orally. Group DM-Ctrl rats were given only distilled water. The rats were treated daily for a period of 28 days.

Table3. Within-group and between-group comparisons of oxidative marker (SOD) before and after administration

| Groups        | <i>pretest</i>           | <i>posttest</i>          | <i>p<sup>a</sup></i> |
|---------------|--------------------------|--------------------------|----------------------|
| 1 (DM-Ac)     | 25.2 ± 3.66 <sup>a</sup> | 84.3 ± 3.95 <sup>c</sup> | 0.000*               |
| 2 (DM-MC)     | 24.9 ± 3.59 <sup>a</sup> | 50.1 ± 5.68 <sup>b</sup> | 0.000*               |
| 3 (DM-PMC)    | 24.5 ± 3.97 <sup>a</sup> | 61.8 ± 4.98 <sup>c</sup> | 0.000*               |
| 4 (water)     | 24.2 ± 4.15 <sup>a</sup> | 21.0 ± 3.09 <sup>a</sup> | 0.008*               |
| <i>F test</i> | 0.080                    | 202.510                  |                      |
| <i>P</i>      | 0.970                    | 0.000                    |                      |

Values are represented as Mean ± SD (n = 6). Means within the same column carrying different superscripts are significant at  $p < 0.05$ . <sup>a</sup>Obtained from a paired t test for the pretest and posttest comparisons ( $p < 0.05$ ).<sup>b</sup>the difference between pretest and posttest. Grup DM-Ac rats were given acarbose 40 mg/100 g feed. Group DM-MC rats were given 10 mg/kg BW bitter melon juice orally. Group DM-PMC rats were given 10 mg/kg BW fermented bitter melon juice containing  $10^7$  probiotics orally. Group DM-Ctrl rats were given only distilled water. The rats were treated daily for a period of 28 days.

Table 4. Coefficient correlation between blood glucose vs SOD

|      | FBG      | PPBG     | SOD      |
|------|----------|----------|----------|
| FBG  | 1        | 1,000**  | -0,943** |
| PPBG | 1,000**  | 1        | -0,941** |
| SOD  | -0,943** | -0,941** | 1        |

\*\*highly significant correlation ( $p < 0,01$ ) based on Pearson correlation

\* significant correlation ( $p < 0,05$ ) based on Pearson correlation

**Pretest**

Normality

**Tests of Normality**

|          | Kolmogorov-Smirnov <sup>a</sup> |    |                   | Shapiro-Wilk |    |      |
|----------|---------------------------------|----|-------------------|--------------|----|------|
|          | Statistic                       | df | Sig.              | Statistic    | df | Sig. |
| FBG_Pre  | ,108                            | 24 | ,200 <sup>*</sup> | ,969         | 24 | ,642 |
| PPBG_Pre | ,086                            | 24 | ,200 <sup>*</sup> | ,978         | 24 | ,858 |
| SOD_Pre  | ,130                            | 24 | ,200 <sup>*</sup> | ,922         | 24 | ,064 |

\*. This is a lower bound of the true significance.

a. Lilliefors Significance Correction

Homogeneity

**Test of Homogeneity of Variance**

|          |                                      | Levene Statistic | df1 | df2    | Sig. |
|----------|--------------------------------------|------------------|-----|--------|------|
| FBG_Pre  | Based on Mean                        | ,805             | 3   | 20     | ,506 |
|          | Based on Median                      | ,816             | 3   | 20     | ,500 |
|          | Based on Median and with adjusted df | ,816             | 3   | 9,850  | ,514 |
|          | Based on trimmed mean                | ,807             | 3   | 20     | ,505 |
| PPBG_Pre | Based on Mean                        | ,561             | 3   | 20     | ,647 |
|          | Based on Median                      | ,560             | 3   | 20     | ,648 |
|          | Based on Median and with adjusted df | ,560             | 3   | 8,650  | ,655 |
|          | Based on trimmed mean                | ,561             | 3   | 20     | ,647 |
| SOD_Pre  | Based on Mean                        | ,259             | 3   | 20     | ,854 |
|          | Based on Median                      | ,282             | 3   | 20     | ,838 |
|          | Based on Median and with adjusted df | ,282             | 3   | 18,546 | ,838 |
|          | Based on trimmed mean                | ,267             | 3   | 20     | ,848 |

Anova

**ANOVA**

|          |                | Sum of Squares | df | Mean Square | F     | Sig. |
|----------|----------------|----------------|----|-------------|-------|------|
| FBG_Pre  | Between Groups | 107,311        | 3  | 35,770      | 2,802 | ,066 |
|          | Within Groups  | 255,305        | 20 | 12,765      |       |      |
|          | Total          | 362,616        | 23 |             |       |      |
| PPBG_Pre | Between Groups | 125,841        | 3  | 41,947      | 3,702 | ,029 |
|          | Within Groups  | 226,598        | 20 | 11,330      |       |      |
|          | Total          | 352,439        | 23 |             |       |      |
| SOD_Pre  | Between Groups | 3,545          | 3  | 1,182       | ,080  | ,970 |
|          | Within Groups  | 296,449        | 20 | 14,822      |       |      |
|          | Total          | 299,993        | 23 |             |       |      |

## Homogeneous subsets

### FBG\_Pre

Tukey HSD

| Treatment | N | Subset for alpha = 0.05 |          |
|-----------|---|-------------------------|----------|
|           |   | 1                       |          |
| 1         | 6 |                         | 254,9587 |
| 2         | 6 |                         | 259,0220 |
| 4         | 6 |                         | 259,7107 |
| 3         | 6 |                         | 260,3994 |
| Sig.      |   |                         | ,069     |

Means for groups in homogeneous subsets are displayed.

a. Uses Harmonic Mean Sample Size = 6,000.

### PPBG\_Pre

Tukey HSD

| Treatment | N | Subset for alpha = 0.05 |          |
|-----------|---|-------------------------|----------|
|           |   | 1                       | 2        |
| 1         | 6 | 266,3233                |          |
| 2         | 6 | 271,4200                | 271,4200 |
| 4         | 6 | 271,6267                | 271,6267 |
| 3         | 6 |                         | 271,7650 |
| Sig.      |   | ,058                    | ,998     |

Means for groups in homogeneous subsets are displayed.

a. Uses Harmonic Mean Sample Size = 6,000.

### SOD\_Pre

Tukey HSD

| Treatment | N | Subset for alpha = 0.05 |         |
|-----------|---|-------------------------|---------|
|           |   | 1                       |         |
| 4         | 6 |                         | 24,1633 |
| 3         | 6 |                         | 24,4900 |
| 2         | 6 |                         | 24,8983 |
| 1         | 6 |                         | 25,1700 |
| Sig.      |   |                         | ,968    |

Means for groups in homogeneous subsets are displayed.

a. Uses Harmonic Mean Sample Size = 6,000.

**Posttest**

Normality

|           | Kolmogorov-Smirnov <sup>a</sup> |    |                   | Shapiro-Wilk |    |      |
|-----------|---------------------------------|----|-------------------|--------------|----|------|
|           | Statistic                       | df | Sig.              | Statistic    | df | Sig. |
| FBG_Post  | ,241                            | 24 | ,001              | ,812         | 24 | ,000 |
| PPBG_Post | ,240                            | 24 | ,001              | ,812         | 24 | ,000 |
| SOD_Post  | ,138                            | 24 | ,200 <sup>+</sup> | ,926         | 24 | ,081 |

\*. This is a lower bound of the true significance. a. Lilliefors Significance Correction

**Tests of Normality**

|           | Treatment | Kolmogorov-Smirnov <sup>a</sup> |    |                   | Shapiro-Wilk |    |      |
|-----------|-----------|---------------------------------|----|-------------------|--------------|----|------|
|           |           | Statistic                       | df | Sig.              | Statistic    | df | Sig. |
| FBG_Post  | P1        | ,212                            | 6  | ,200 <sup>+</sup> | ,880         | 6  | ,271 |
|           | P2        | ,262                            | 6  | ,200 <sup>+</sup> | ,876         | 6  | ,252 |
|           | P3        | ,142                            | 6  | ,200 <sup>+</sup> | ,985         | 6  | ,973 |
|           | P4        | ,247                            | 6  | ,200 <sup>+</sup> | ,901         | 6  | ,383 |
| PPBG_Post | P1        | ,210                            | 6  | ,200 <sup>+</sup> | ,910         | 6  | ,435 |
|           | P2        | ,288                            | 6  | ,130              | ,927         | 6  | ,557 |
|           | P3        | ,236                            | 6  | ,200 <sup>+</sup> | ,868         | 6  | ,220 |
|           | P4        | ,256                            | 6  | ,200 <sup>+</sup> | ,869         | 6  | ,221 |
| SOD_Post  | P1        | ,171                            | 6  | ,200 <sup>+</sup> | ,973         | 6  | ,909 |
|           | P2        | ,163                            | 6  | ,200 <sup>+</sup> | ,949         | 6  | ,733 |
|           | P3        | ,165                            | 6  | ,200 <sup>+</sup> | ,913         | 6  | ,454 |
|           | P4        | ,174                            | 6  | ,200 <sup>+</sup> | ,976         | 6  | ,929 |

\*. This is a lower bound of the true significance.

a. Lilliefors Significance Correction

Homogeneity

**Test of Homogeneity of Variance**

|               |                                      | Levene Statistic | df1 | df2    | Sig. |
|---------------|--------------------------------------|------------------|-----|--------|------|
| glu_puasaPost | Based on Mean                        | 1,283            | 3   | 20     | ,307 |
|               | Based on Median                      | ,980             | 3   | 20     | ,422 |
|               | Based on Median and with adjusted df | ,980             | 3   | 6,844  | ,456 |
|               | Based on trimmed mean                | 1,134            | 3   | 20     | ,359 |
| glukosa2jPost | Based on Mean                        | ,976             | 3   | 20     | ,424 |
|               | Based on Median                      | ,509             | 3   | 20     | ,681 |
|               | Based on Median and with adjusted df | ,509             | 3   | 9,378  | ,686 |
|               | Based on trimmed mean                | ,848             | 3   | 20     | ,484 |
| SOD_Post      | Based on Mean                        | ,822             | 3   | 20     | ,497 |
|               | Based on Median                      | ,769             | 3   | 20     | ,525 |
|               | Based on Median and with adjusted df | ,769             | 3   | 17,214 | ,527 |
|               | Based on trimmed mean                | ,821             | 3   | 20     | ,498 |

**ANOVA**

|           |                | Sum of Squares | df | Mean Square | F        | Sig. |
|-----------|----------------|----------------|----|-------------|----------|------|
| FBG_Post  | Between Groups | 111127,103     | 3  | 37042,368   | 3600,286 | ,000 |
|           | Within Groups  | 205,775        | 20 | 10,289      |          |      |
|           | Total          | 111332,878     | 23 |             |          |      |
| PPBG_Post | Between Groups | 110508,096     | 3  | 36836,032   | 3573,526 | ,000 |
|           | Within Groups  | 206,161        | 20 | 10,308      |          |      |
|           | Total          | 110714,257     | 23 |             |          |      |
| SOD_Post  | Between Groups | 12486,040      | 3  | 4162,013    | 202,510  | ,000 |
|           | Within Groups  | 411,042        | 20 | 20,552      |          |      |
|           | Total          | 12897,082      | 23 |             |          |      |

**Homogenous subsets**

**FBG\_Post**

Tukey HSD

| Treatment | N | Subset for alpha = 0.05 |          |          |          |
|-----------|---|-------------------------|----------|----------|----------|
|           |   | 1                       | 2        | 3        | 4        |
| 1         | 6 | 88,8889                 |          |          |          |
| 3         | 6 |                         | 109,0909 |          |          |
| 2         | 6 |                         |          | 164,3308 |          |
| 4         | 6 |                         |          |          | 264,3939 |
| Sig.      |   | 1,000                   | 1,000    | 1,000    | 1,000    |

Means for groups in homogeneous subsets are displayed.

a. Uses Harmonic Mean Sample Size = 6,000.

**PPBG\_Post**

Tukey HSD

| Treatment | N | Subset for alpha = 0.05 |          |          |          |
|-----------|---|-------------------------|----------|----------|----------|
|           |   | 1                       | 2        | 3        | 4        |
| 1         | 6 | 100,4433                |          |          |          |
| 3         | 6 |                         | 120,1383 |          |          |
| 2         | 6 |                         |          | 174,8733 |          |
| 4         | 6 |                         |          |          | 275,3150 |
| Sig.      |   | 1,000                   | 1,000    | 1,000    | 1,000    |

Means for groups in homogeneous subsets are displayed.

a. Uses Harmonic Mean Sample Size = 6,000.

**SOD\_Post**

Tukey HSD

| Treatment | N | Subset for alpha = 0.05 |         |         |         |
|-----------|---|-------------------------|---------|---------|---------|
|           |   | 1                       | 2       | 3       | 4       |
| 4         | 6 | 20,9983                 |         |         |         |
| 2         | 6 |                         | 50,0983 |         |         |
| 3         | 6 |                         |         | 61,8200 |         |
| 1         | 6 |                         |         |         | 84,2633 |
| Sig.      |   | 1,000                   | 1,000   | 1,000   | 1,000   |

Means for groups in homogeneous subsets are displayed.

a. Uses Harmonic Mean Sample Size = 6,000.

**Pair t-test**

Pair t – test FBG

**Paired Samples Test**

|                                 | Paired Differences |                   |                       |                                              |           | t       | df | Sig.<br>(2-tailed) |
|---------------------------------|--------------------|-------------------|-----------------------|----------------------------------------------|-----------|---------|----|--------------------|
|                                 | Mean               | Std.<br>Deviation | Std.<br>Error<br>Mean | 95% Confidence Interval<br>of the Difference |           |         |    |                    |
|                                 |                    |                   |                       | Lower                                        | Upper     |         |    |                    |
| Pair 1 FGB_p1_Pre - FGB_p1_Post | 166,06979          | 2,68592           | 1,09652               | 163,25109                                    | 168,88849 | 151,451 | 5  | ,000               |
| Pair 2 FBG_p2_Pre - FBG_p2_Post | 94,69123           | 3,52503           | 1,43909               | 90,99194                                     | 98,39052  | 65,800  | 5  | ,000               |
| Pair 3 FBG_p3_Pre - FBG_p3_Post | 151,30854          | 2,02613           | ,82716                | 149,18225                                    | 153,43483 | 182,925 | 5  | ,000               |
| Pair 4 FBG_p4_Pre - FGB_p4_Post | -4,68320           | 2,57349           | 1,05062               | -7,38391                                     | -1,98248  | -4,458  | 5  | ,007               |

Pair t – test PPBG

**Paired Samples Test**

|                                   | Paired Differences |                   |                       |                                              |           | t       | df | Sig.<br>(2-tailed) |
|-----------------------------------|--------------------|-------------------|-----------------------|----------------------------------------------|-----------|---------|----|--------------------|
|                                   | Mean               | Std.<br>Deviation | Std.<br>Error<br>Mean | 95% Confidence Interval<br>of the Difference |           |         |    |                    |
|                                   |                    |                   |                       | Lower                                        | Upper     |         |    |                    |
| Pair 1 PPBG_p1_Pre – PPBG_p1_Post | 165,88000          | 2,85183           | 1,16426               | 162,88718                                    | 168,87282 | 142,477 | 5  | ,000               |
| Pair 2 PPBG_p2_Pre – PPBG_p2_Post | 96,54667           | 3,50040           | 1,42903               | 92,87322                                     | 100,22011 | 67,561  | 5  | ,000               |
| Pair 3 PPBG_p3_Pre – PPBG_p3_Post | 151,62667          | 1,44883           | ,59148                | 150,10621                                    | 153,14712 | 256,350 | 5  | ,000               |
| Pair 4 PPBG_p4_Pre – PPBG_p4_Post | -3,68833           | 2,42389           | ,98955                | -6,23205                                     | -1,14461  | -3,727  | 5  | ,014               |

Pair t – test SOD

**Paired Samples Test**

|                                 | Paired Differences |                   |                    |                                              |           | t       | df | Sig.<br>(2-tailed) |
|---------------------------------|--------------------|-------------------|--------------------|----------------------------------------------|-----------|---------|----|--------------------|
|                                 | Mean               | Std.<br>Deviation | Std. Error<br>Mean | 95% Confidence Interval<br>of the Difference |           |         |    |                    |
|                                 |                    |                   |                    | Lower                                        | Upper     |         |    |                    |
| Pair 1 SOD_p1_Pre - SOD_p1_Post | -59,09333          | 5,61668           | 2,29300            | -64,98767                                    | -53,19899 | -25,771 | 5  | ,000               |
| Pair 2 SOD_p2_Pre - SOD_p2_Post | -25,20000          | 5,44637           | 2,22347            | -30,91561                                    | -19,48439 | -11,334 | 5  | ,000               |
| Pair 3 SOD_p3_Pre - SOD_p3_Post | -37,33000          | 6,65669           | 2,71758            | -44,31577                                    | -30,34423 | -13,736 | 5  | ,000               |
| Pair 4 SOD_p4_Pre - SOD_p4_Post | 3,16500            | 1,80242           | ,73583             | 1,27348                                      | 5,05652   | 4,301   | 5  | ,008               |
